# Supplementary material for: Morphological dissection of behavior: thoracic musculature clarifies independent development of jumping mechanisms between sister groups, planthoppers and leafhoppers (Insecta: Hemiptera: Auchenorrhyncha)
Source: Springer Nature journal article supplement (doi:10.1007/s13127-017-0336-4), 2017-08-04
Supplement: MOESM1 [file 13127_2017_336_MOESM1_ESM.nex]

#NEXUS

BEGIN TAXA;
	TITLE Taxa;
	DIMENSIONS NTAX=15;
	TAXLABELS
		Cicadidae.Graptopsaltria Cicadidae.Meimuna Aphrophoridae Clastopteridae Cercopoidae Machaerotidae Membracidae Cicadellidae Delphacidae Cixiidae Fulgoridae Flattidae Ricaniidae PSOCOPTERA ZORAPTERA 
	;

END;


BEGIN CHARACTERS;
	TITLE  Character_Matrix;
	DIMENSIONS  NCHAR=11;
	FORMAT DATATYPE = STANDARD GAP = - MISSING = ? SYMBOLS = "  0 1 2";
	MATRIX
	Cicadidae.Graptopsaltria  01000010112
	Cicadidae.Meimuna         01000010112
	Aphrophoridae             11001011111
	Clastopteridae            1100101?111
	Cercopoidae               1100101?111
	Machaerotidae             11001011111
	Membracidae               11001010101
	Cicadellidae              11001010111
	Delphacidae               1011?100000
	Cixiidae                  1011?100000
	Fulgoridae                1011?100000
	Flattidae                 1011?100000
	Ricaniidae                1011?100000
	PSOCOPTERA                00000000000
	ZORAPTERA                 000000000?0

;

END;
BEGIN TREES;
	Title 'Trees from "Cicado.MacClade.nex"';
	LINK Taxa = Taxa;
	TRANSLATE
		1 Cicadidae.Graptopsaltria,
		2 Cicadidae.Meimuna,
		3 Aphrophoridae,
		4 Clastopteridae,
		5 Cercopoidae,
		6 Machaerotidae,
		7 Membracidae,
		8 Cicadellidae,
		9 Delphacidae,
		10 Cixiidae,
		11 Fulgoridae,
		12 Flattidae,
		13 Ricaniidae,
		14 PSOCOPTERA,
		15 ZORAPTERA;
	TREE UNTITLED = ((((((1,2),(((3,4),5),6)),(7,8)),((10,9),(11,(12,13)))),14),15);

END;
